# Supplementary material for: Recreating the Trabecular Outflow Tissue on Implantable, Micropatterned, Ultrathin, Porous Polycaprolactone Scaffolds
Source: MDPI journal article supplement (doi:10.3390/bioengineering10060679), 2023-06-02
Supplement: s1 [file s1]

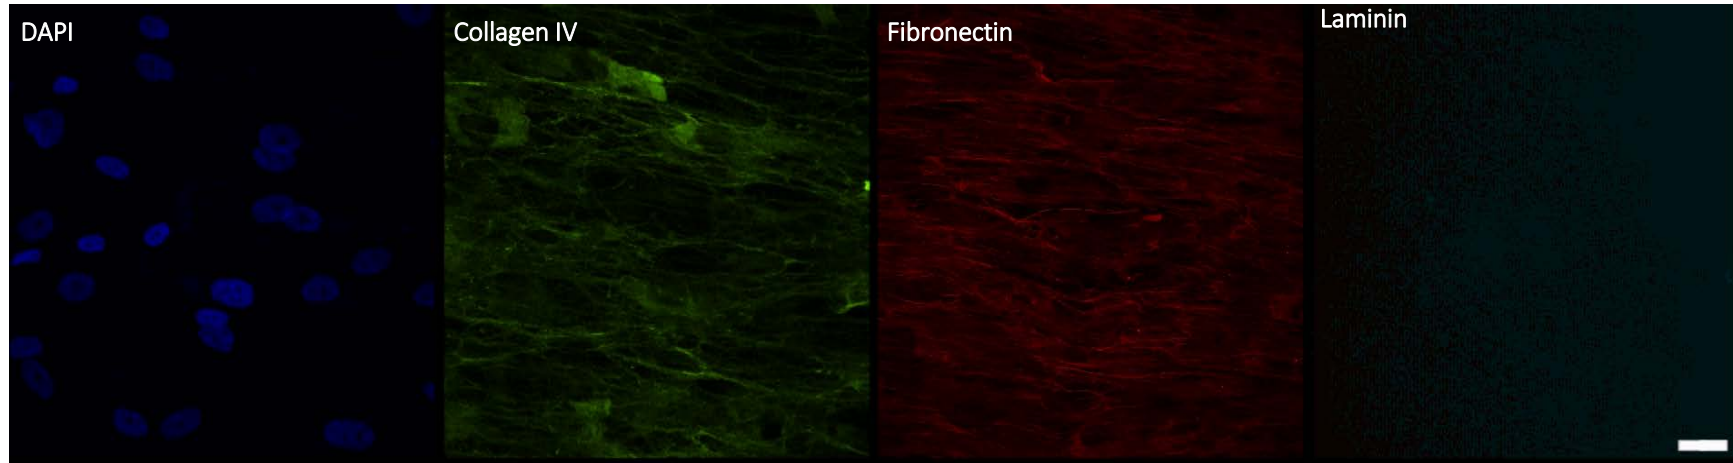

**Figure S1** . Expression of ECM proteins, collagen, fibronectin and laminin of HTM cells grown on gelatin-coated coverslips.

a

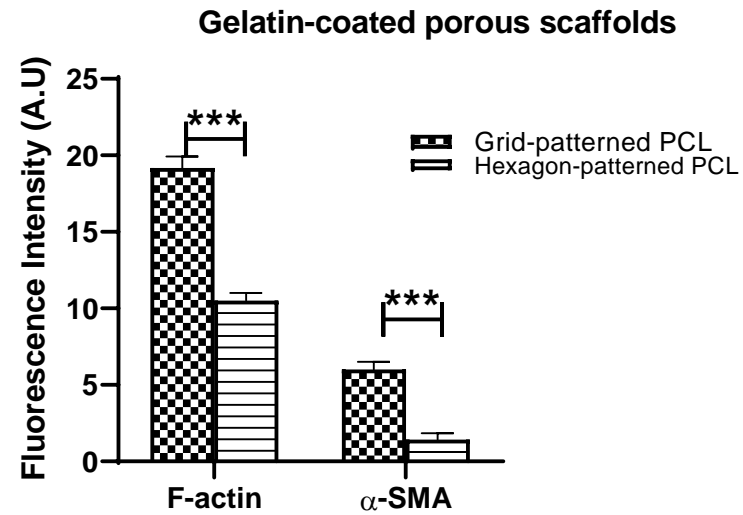

b

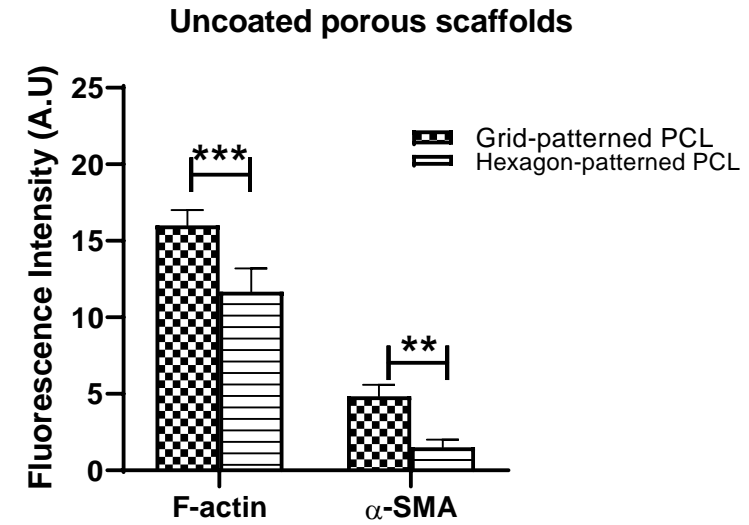

**Figure S2.** ImageJ quantification of fluorescence intensity of F-actin and  $\alpha$ -SMA expression in HTM cells grown in grid- and hexagon-patterned PCL scaffolds with (a) and without (b) gelatin-coating. \*,  $p < 0.05$ . \*\*,  $p < 0.01$ . \*\*\*,  $p < 0.001$ .
